# Supplementary material for: Analysis of multi-level spatial data reveals strong synchrony in seasonal influenza epidemics across Norway, Sweden, and Denmark
Source: PubMed Central journal article supplement (PMC5957349; doi:10.1371/journal.pone.0197519), 2018-05-17
Supplement: pone.0197519.s002.pdf [file pone.0197519.s002.pdf]

**Table S1. Mantel tests at the municipality-level.**

|                                    | <b>Amplitude correlations</b> |                 | <b>Phase correlations</b> |                 |
|------------------------------------|-------------------------------|-----------------|---------------------------|-----------------|
|                                    | Correlation                   | <i>p</i> -value | Correlation               | <i>p</i> -value |
| <i>Mantel tests</i>                |                               |                 |                           |                 |
| Altitude <sup>‡</sup>              | −0.15                         | 0.001           | −0.14                     | 0.003           |
| Air travel <sup>II</sup>           | −0.006                        | 0.42            | 0.008                     | 0.39            |
| <i>partial Mantel tests</i>        |                               |                 |                           |                 |
| Population, adjusted for altitude  | 0.37                          | 0.0002          | 0.27                      | 0.0003          |
| Distance, adjusted for altitude    | −0.34                         | 0.0001          | −0.16                     | 0.001           |
| Humidity, adjusted for altitude    | 0.33                          | 0.0002          | 0.15                      | 0.002           |
| Temperature, adjusted for altitude | 0.35                          | 0.0002          | 0.16                      | 0.002           |
| Altitude, adjusted for:            |                               |                 |                           |                 |
| Population                         | −0.04                         | 0.16            | −0.07                     | 0.07            |
| Distance                           | −0.14                         | 0.003           | −0.13                     | 0.006           |
| Humidity                           | −0.14                         | 0.001           | −0.14                     | 0.004           |
| Temperature                        | −0.14                         | 0.002           | −0.14                     | 0.005           |

Mantel and partial Mantel tests using Spearman correlations to detect associations between the amplitude and phase synchrony of Norwegian municipalities and a number of additional predictor variables.

‡ represents the absolute difference in average altitude between each municipality pair.

II represents the average number of airline passengers traveling between each municipality pair.
