# Supplementary material for: Analysis of multi-level spatial data reveals strong synchrony in seasonal influenza epidemics across Norway, Sweden, and Denmark
Source: PubMed Central journal article supplement (PMC5957349; doi:10.1371/journal.pone.0197519), 2018-05-17
Supplement: pone.0197519.s004.pdf [file pone.0197519.s004.pdf]

**Table S3.** Mantel tests at the county-level using downsampled data.

|                             | Phase correlations |                 |
|-----------------------------|--------------------|-----------------|
|                             | Correlation        | <i>p</i> -value |
| <i>Mantel tests</i>         |                    |                 |
| Population*                 | −0.21              | 0.04            |
| Distance                    | −0.13              | 0.08            |
| Humidity                    | 0.13               | 0.087           |
| Temperature                 | −0.005             | 0.49            |
| Region†                     | −0.66              | 0.0001          |
| <i>partial Mantel tests</i> |                    |                 |
| Population, adjusted for:   |                    |                 |
| Distance                    | −0.23              | 0.03            |
| Humidity                    | −0.21              | 0.026           |
| Temperature                 | −0.21              | 0.041           |
| Region                      | −0.04              | 0.35            |
| Distance, adjusted for:     |                    |                 |
| Population                  | −0.15              | 0.05            |
| Humidity                    | −0.03              | 0.33            |
| Temperature                 | −0.26              | 0.0006          |
| Region                      | 0.09               | 0.15            |
| Humidity, adjusted for:     |                    |                 |
| Population                  | 0.16               | 0.04            |
| Distance                    | 0.04               | 0.33            |
| Temperature                 | 0.20               | 0.01            |
| Region                      | −0.11              | 0.11            |
| Temperature, adjusted for:  |                    |                 |
| Population                  | 0.009              | 0.43            |
| Distance                    | −0.22              | 0.001           |
| Humidity                    | −0.16              | 0.03            |
| Region                      | −0.15              | 0.04            |
| Region, adjusted for:       |                    |                 |
| Population                  | −0.64              | 0.0001          |
| Distance                    | −0.66              | 0.0001          |
| Humidity                    | −0.66              | 0.0001          |
| Temperature                 | −0.67              | 0.0001          |

Mantel and partial Mantel tests using Spearman correlations to detect associations between the phase synchrony of Norwegian, Swedish, and Danish counties and a number of predictor variables (using downsampled Norwegian and Danish data).

\* represents the product of population sizes for each municipality pair.

† binary variable indicating whether two counties are in the same country (0) or not (1).
