# Supplementary material for: Analysis of multi-level spatial data reveals strong synchrony in seasonal influenza epidemics across Norway, Sweden, and Denmark
Source: PubMed Central journal article supplement (PMC5957349; doi:10.1371/journal.pone.0197519), 2018-05-17
Supplement: pone.0197519.s005.pdf [file pone.0197519.s005.pdf]

**Table S4. Mantel tests at the county-level, excluding Sweden.**

|                             | <b>Phase correlations</b> |                 |
|-----------------------------|---------------------------|-----------------|
|                             | Correlation               | <i>p</i> -value |
| <i>Mantel tests</i>         |                           |                 |
| Population*                 | -0.30                     | 0.04            |
| Distance                    | -0.13                     | 0.17            |
| Humidity                    | 0.13                      | 0.19            |
| Temperature                 | 0.04                      | 0.36            |
| Region†                     | -0.69                     | 0.0001          |
| <i>partial Mantel tests</i> |                           |                 |
| Population, adjusted for:   |                           |                 |
| Distance                    | -0.31                     | 0.04            |
| Humidity                    | -0.31                     | 0.04            |
| Temperature                 | -0.31                     | 0.04            |
| Region                      | 0.24                      | 0.07            |
| Distance, adjusted for:     |                           |                 |
| Population                  | -0.15                     | 0.13            |
| Humidity                    | -0.03                     | 0.40            |
| Temperature                 | -0.21                     | 0.045           |
| Region                      | 0.13                      | 0.20            |
| Humidity, adjusted for:     |                           |                 |
| Population                  | 0.15                      | 0.16            |
| Distance                    | 0.03                      | 0.38            |
| Temperature                 | 0.17                      | 0.12            |
| Region                      | -0.15                     | 0.17            |
| Temperature, adjusted for:  |                           |                 |
| Population                  | 0.06                      | 0.31            |
| Distance                    | -0.17                     | 0.09            |
| Humidity                    | -0.12                     | 0.19            |
| Region                      | -0.13                     | 0.19            |
| Region, adjusted for:       |                           |                 |
| Population                  | -0.68                     | 0.0001          |
| Distance                    | -0.69                     | 0.0001          |
| Humidity                    | -0.69                     | 0.0001          |
| Temperature                 | -0.70                     | 0.0001          |

Mantel and partial Mantel tests using Spearman correlations to detect associations between the phase synchrony of Norwegian and Danish counties and a number of predictor variables (after excluding the Swedish data).

\* represents the product of population sizes for each municipality pair.

† binary variable indicating whether two counties are in the same country (1) or not (0).
