# Supplementary material for: Analysis of multi-level spatial data reveals strong synchrony in seasonal influenza epidemics across Norway, Sweden, and Denmark
Source: PubMed Central journal article supplement (PMC5957349; doi:10.1371/journal.pone.0197519), 2018-05-17

Phase  
difference  
(days)

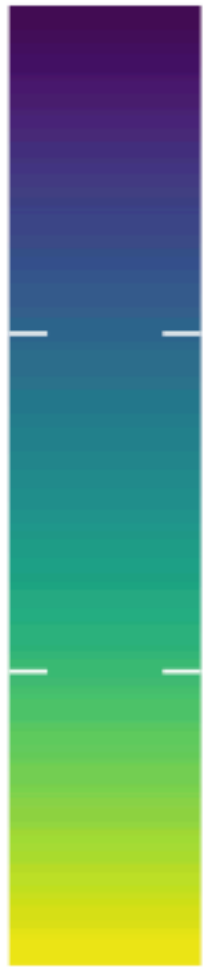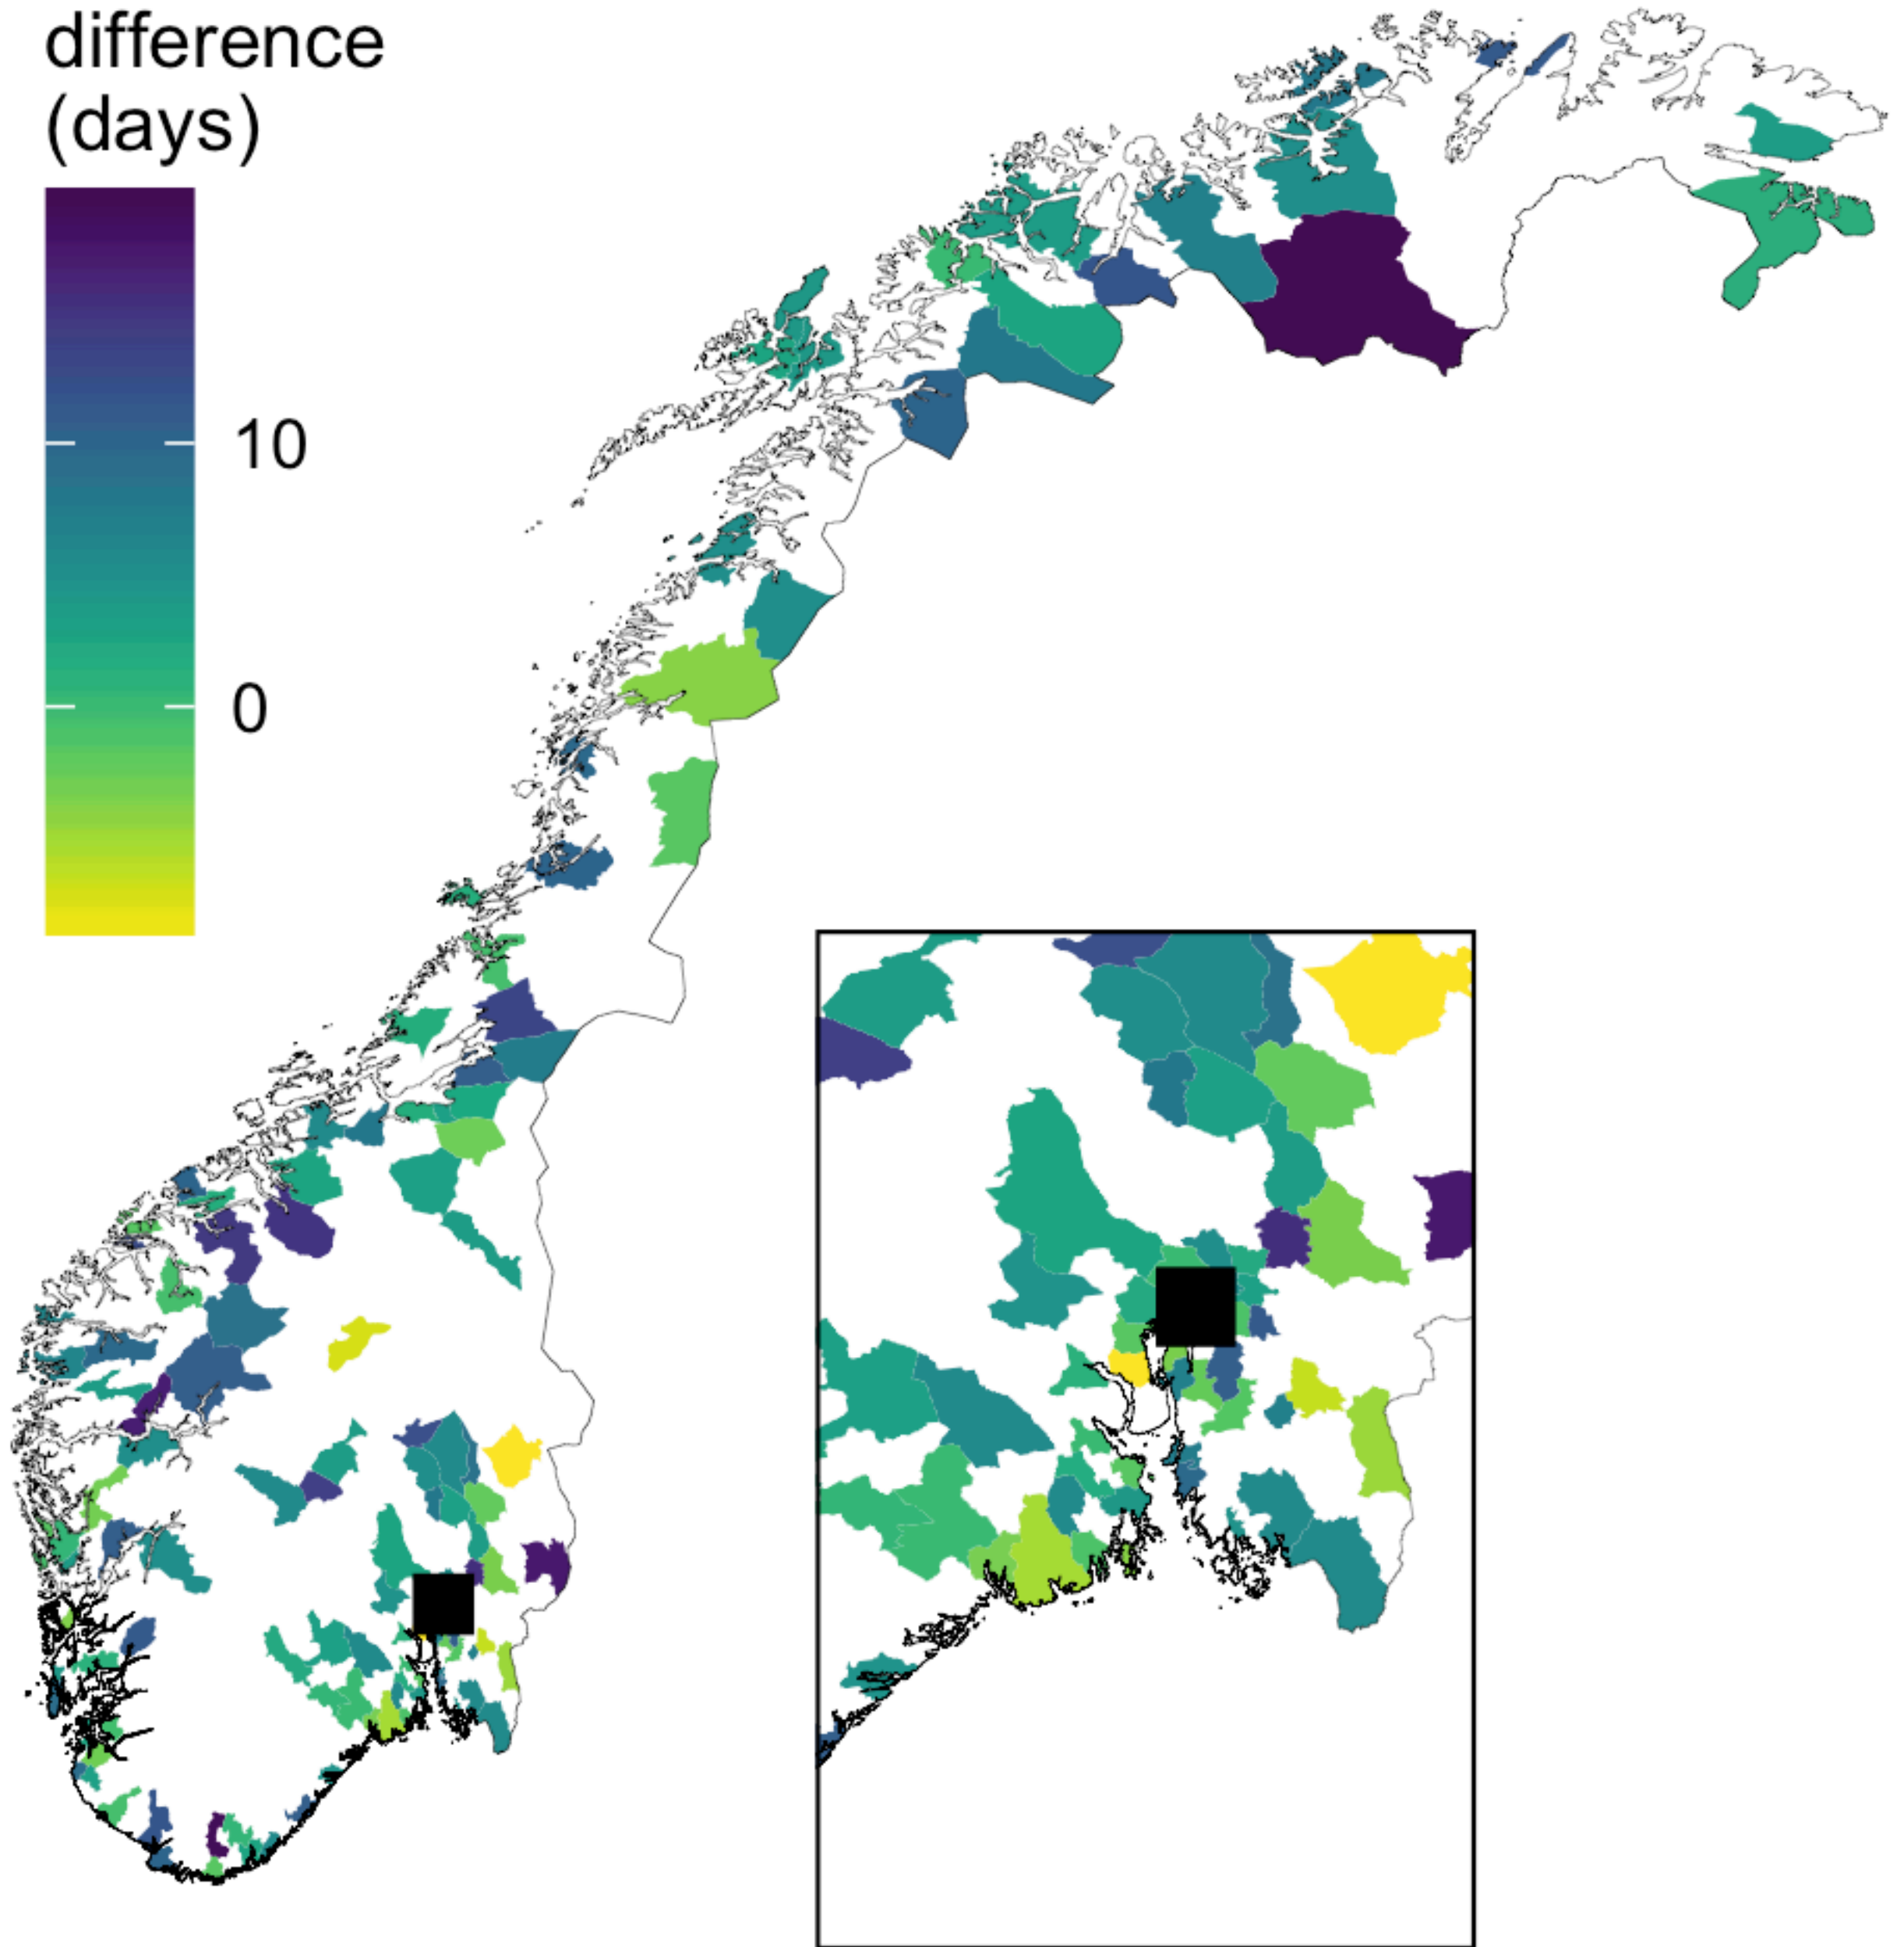

Supplement: pone.0197519.s011.pdf [file pone.0197519.s011.pdf]
